# Supplementary material
Source: Springer Nature journal article supplement (https://www.springermedizin.de/resource/supplementary/13048_2009_39_MOESM3_ESM.pdf/9664816)

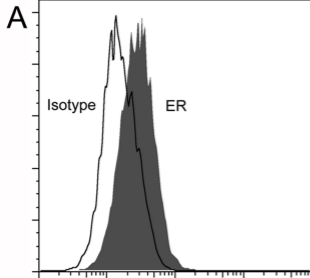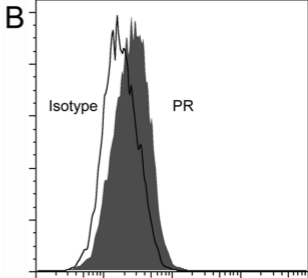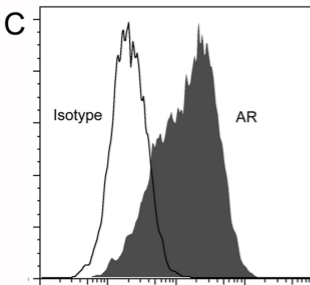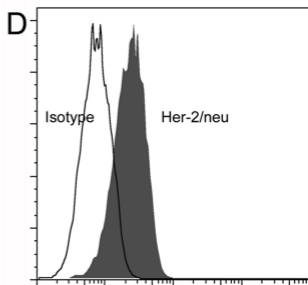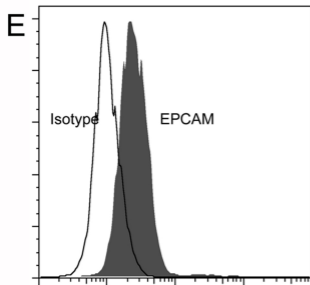

Supplement: MOESM3 [file 9664816]
